# Supplementary material for: Oleanolic Acid’s Semisynthetic Derivatives HIMOXOL and Br-HIMOLID Show Proautophagic Potential and Inhibit Migration of HER2-Positive Breast Cancer Cells In Vitro
Source: MDPI journal article supplement (doi:10.3390/ijms222011273), 2021-10-19
Supplement: s1 [file s1]

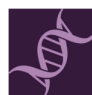

# Oleanolic Acid's Semisynthetic Derivatives HIMOXOL and Br-HIMOLID Show Proautophagic Potential and Inhibit Migration of HER2-Positive Breast Cancer Cells In Vitro

Natalia Lisiak<sup>1\*</sup>, Izabela Lewicka<sup>2</sup>, Mariusz Kaczmarek<sup>3,4</sup>, Jacek Kujawski<sup>5</sup>, Barbara Bednarczyk-Cwynar<sup>5</sup>, Lucjusz Zaprutko<sup>5</sup>, Błażej Rubiś<sup>1</sup>

## Supplementary Materials

Expanded analysis of the *in silico* studies on ligands interactions with the 3pp0.pdb protein.

**Table S1.** Calculated values of energetic terms [kcal/mol] regarding the ligand-amino acid interaction using the SAPT0 method for docked OA.

| Amino acid | Energy         |          |           |            |        |
|------------|----------------|----------|-----------|------------|--------|
|            | Electrostatics | Exchange | Induction | Dispersion | Total  |
| Val734     | 0.035          | 0.000    | -0.001    | -0.066     | -0.033 |
| Ala751     | -0.002         | 0.000    | 0.000     | -0.005     | -0.008 |
| Leu726     | 0.124          | 0.000    | -0.006    | -0.071     | 0.048  |
| Leu785     | 0.008          | 0.000    | 0.000     | -0.003     | 0.005  |
| Thr798     | 0.004          | 0.000    | 0.000     | -0.004     | 0.000  |
| Leu800     | 0.005          | 0.000    | 0.000     | -0.004     | 0.001  |
| Met801     | 0.019          | 0.000    | 0.000     | -0.005     | 0.014  |
| Cys805     | 0.058          | 0.000    | -0.003    | -0.092     | -0.037 |
| Ala847     | -0.063         | 0.000    | -0.003    | -0.139     | -0.205 |
| Ala848     | -0.064         | 0.000    | -0.004    | -0.134     | -0.201 |
| Asn850     | -0.394         | 0.009    | -0.058    | -0.527     | -0.969 |
| Val851     | 0.027          | 0.000    | -0.001    | -0.039     | -0.014 |
| Leu846     | -0.003         | 0.000    | -0.004    | -0.116     | -0.123 |
| Leu852     | -0.003         | 0.000    | 0.000     | -0.023     | -0.026 |
| Ile861     | -0.007         | 0.000    | 0.000     | -0.015     | -0.022 |
| Thr862     | -0.048         | 0.000    | -0.002    | -0.037     | -0.087 |
| Thr911     | 0.042          | 0.000    | -0.001    | -0.017     | 0.024  |
| Asp845     | -47.395        | 127.998  | -21.430   | -16.725    | 42.448 |
| Phe731     | -50.325        | 162.091  | -17.598   | -31.849    | 62.317 |

**Table S2.** Calculated values of energetic terms [kcal/mol] regarding the ligand-amino acid interaction using the SAPT0 method for docked HIMOXOL.

| Amino acid | Energy         |          |           |            |        |
|------------|----------------|----------|-----------|------------|--------|
|            | Electrostatics | Exchange | Induction | Dispersion | Total  |
| Val734     | 0.106          | 0.000    | -0.009    | -0.128     | -0.031 |
| Ala751     | -0.083         | 0.000    | -0.001    | -0.009     | -0.093 |
| Leu726     | 0.564          | 0.000    | -0.035    | -0.138     | 0.391  |
| Leu785     | -0.027         | 0.000    | 0.000     | -0.004     | -0.032 |
| Thr798     | 0.044          | 0.000    | 0.000     | -0.006     | 0.038  |
| Leu800     | -0.069         | 0.000    | -0.001    | -0.007     | -0.077 |
| Met801     | 0.139          | 0.000    | -0.002    | -0.009     | 0.129  |
| Cys805     | 0.361          | 0.001    | -0.045    | -0.273     | 0.044  |
| Ala847     | 0.179          | 0.000    | -0.013    | -0.149     | 0.017  |
| Ala848     | 0.186          | 0.000    | -0.015    | 0.242      | -0.071 |
| Asn850     | 1.429          | 0.007    | -0.110    | -0.689     | 0.637  |
| Val851     | 0.325          | 0.000    | -0.010    | -0.066     | 0.249  |
| Leu846     | -0.177         | 0.000    | -0.007    | -0.117     | -0.301 |
| Leu852     | -0.150         | 0.000    | -0.004    | -0.044     | -0.198 |
| Ile861     | -0.051         | 0.000    | -0.002    | -0.022     | -0.075 |
| Thr862     | -0.168         | 0.000    | -0.009    | -0.058     | -0.235 |
| Thr911     | 0.189          | 0.000    | -0.004    | -0.022     | 0.164  |
| Asp845     | -0.869         | 2.092    | -0.392    | -3.353     | -2.521 |
| Phe731     | -9.674         | 36.732   | -4.356    | -16.919    | 5.782  |

**Table S3.** Calculated values of energetic terms [kcal/mol] regarding the ligand-amino acid interaction using the SAPT0 method for docked Br-HIMOLID.

| Amino acid | Energy         |          |           |            |        |
|------------|----------------|----------|-----------|------------|--------|
|            | Electrostatics | Exchange | Induction | Dispersion | Total  |
| Val734     | -0.138         | 0.000    | -0.009    | -0.088     | -0.234 |
| Ala751     | -0.037         | 0.000    | -0.001    | -0.006     | -0.044 |
| Leu726     | -0.179         | 0.000    | -0.007    | -0.074     | -0.260 |
| Leu785     | -0.030         | 0.000    | -0.001    | -0.003     | -0.034 |
| Thr798     | 0.009          | 0.000    | 0.000     | -0.004     | 0.004  |
| Leu800     | -0.036         | 0.000    | 0.000     | -0.005     | -0.041 |
| Met801     | -0.002         | 0.000    | -0.001    | -0.006     | -0.010 |
| Cys805     | -0.070         | 0.000    | -0.005    | -0.151     | -0.227 |
| Ala847     | 0.150          | 0.000    | -0.006    | -0.150     | -0.006 |
| Ala848     | 0.069          | 0.000    | -0.005    | -0.238     | -0.173 |
| Asn850     | 0.549          | 0.183    | -0.161    | -0.888     | -0.316 |
| Val851     | 0.010          | 0.000    | -0.003    | -0.055     | -0.049 |
| Leu846     | -0.164         | 0.000    | -0.002    | -0.106     | -0.272 |
| Leu852     | -0.040         | 0.000    | -0.002    | -0.032     | -0.074 |
| Ile861     | -0.006         | 0.000    | -0.001    | -0.019     | -0.025 |
| Thr862     | 0.029          | 0.000    | -0.006    | -0.051     | -0.027 |
| Thr911     | 0.033          | 0.000    | -0.002    | -0.021     | 0.010  |
| Asp845     | -7.164         | 18.021   | -1.994    | -5.630     | 3.233  |
| Phe731     | -12.962        | 43.580   | -6.083    | -13.375    | 11.159 |

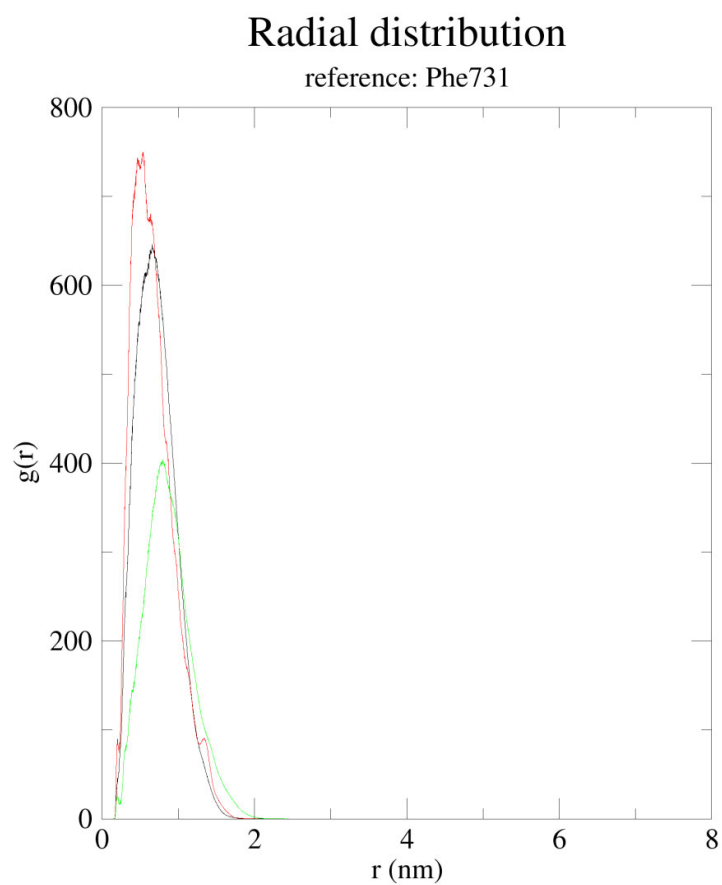

**Figure S1.** Radial distribution functions (RDFs) for OA (black), HIMOXOL (red) or Br-HIMOLID (light green) and Phe731 obtained from the MD simulation.

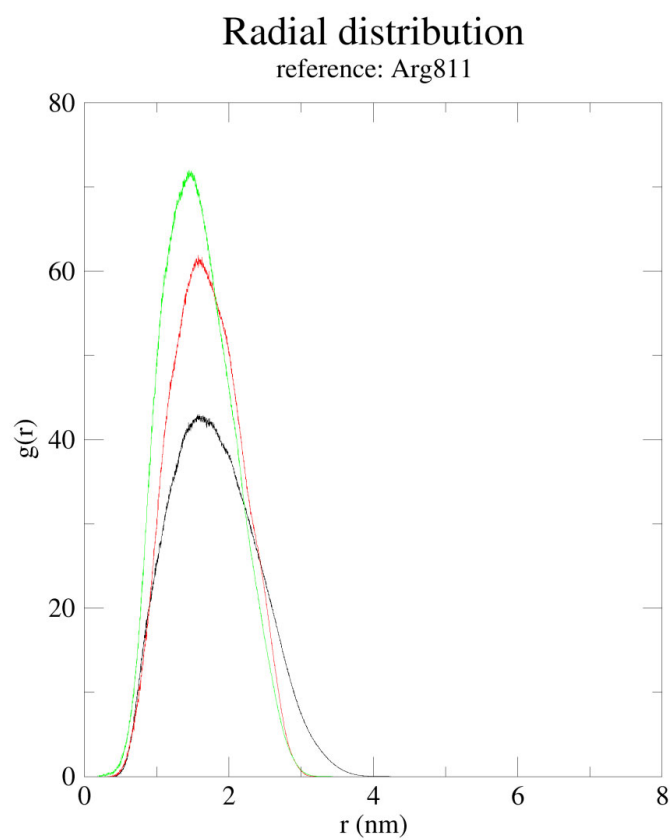

**Figure S2.** Radial distribution functions (RDFs) for OA (black), HIMOXOL (red) or Br-HIMOLID (light green) and Arg811 obtained from the MD simulation.

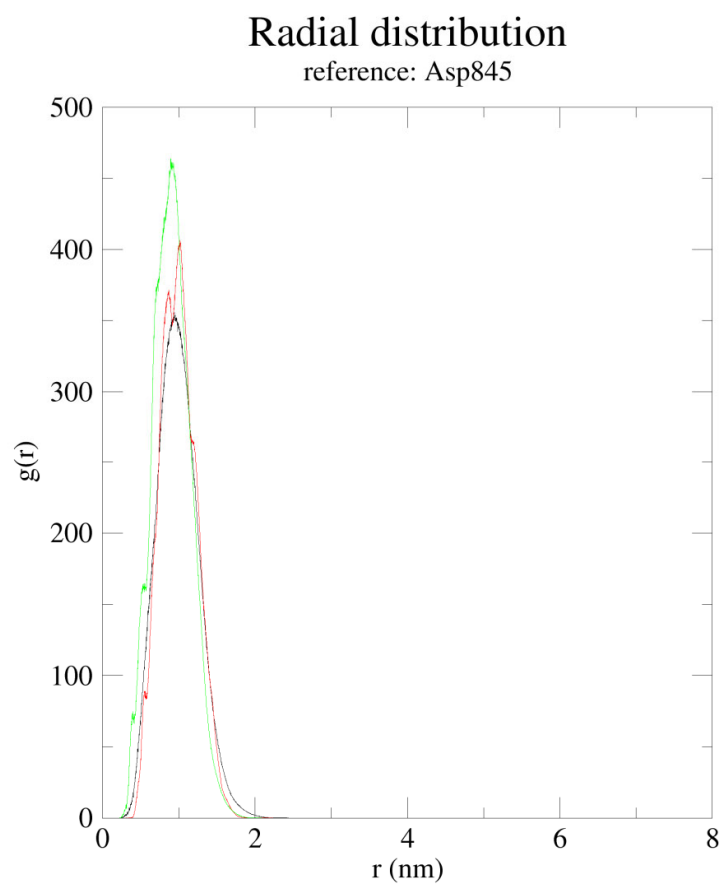

**Figure S3.** Radial distribution functions (RDFs) for OA (black), HIMOXOL (red) or Br-HIMOLID (light green) and Asp845 obtained from the MD simulation.

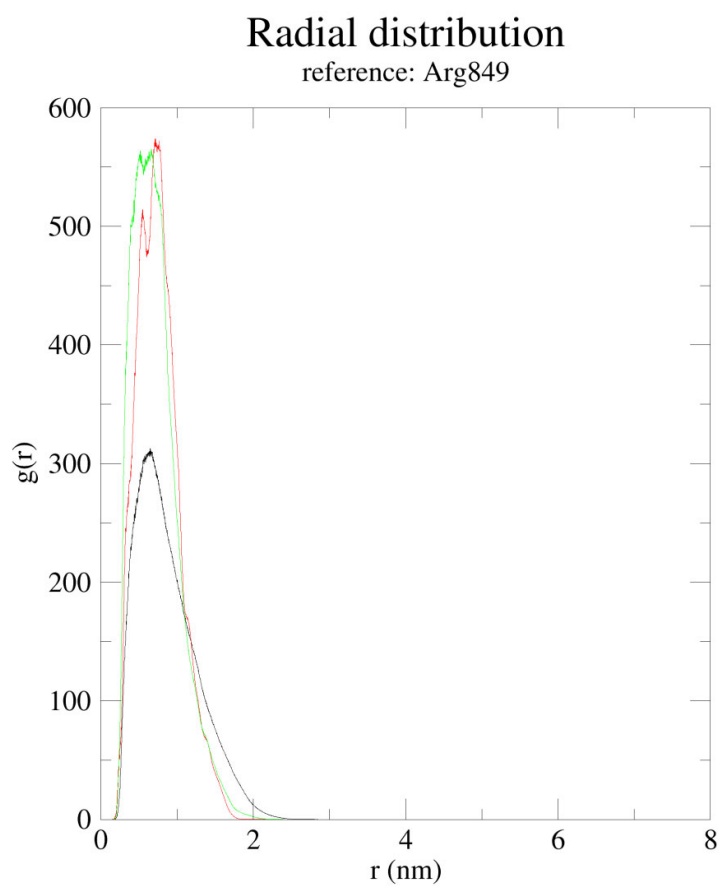

**Figure S4.** Radial distribution functions (RDFs) for OA (black), HIMOXOL (red) or Br-HIMOLID (light green) and Arg849 obtained from the MD simulation.

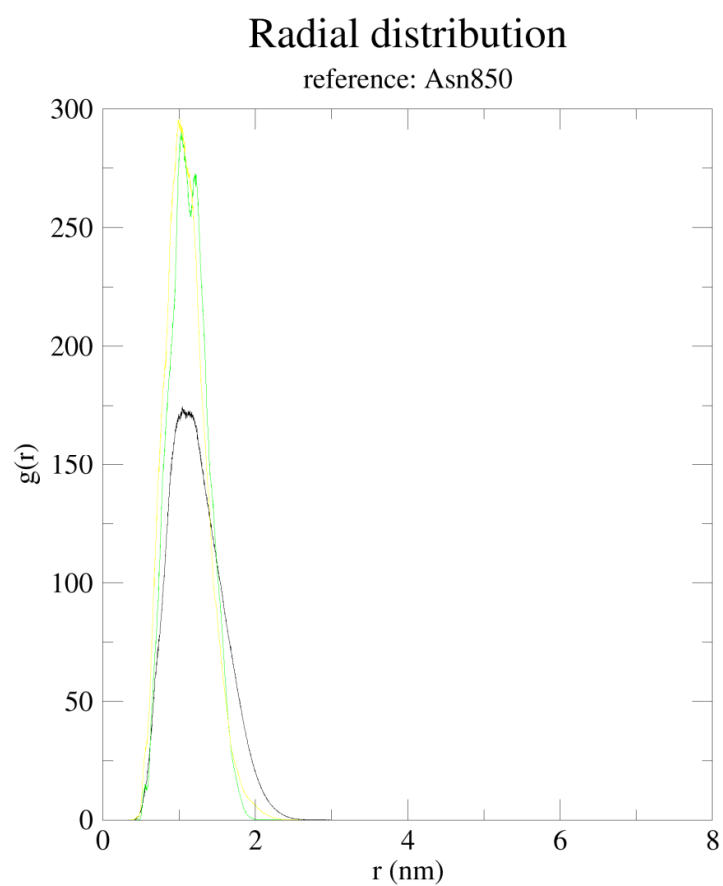

**Figure S5.** Radial distribution functions (RDFs) for OA (black), HIMOXOL (red) or Br-HIMOLID (light green) and Asn850 obtained from the MD simulation.

### Uninterrupted hydrogen bond lifetime

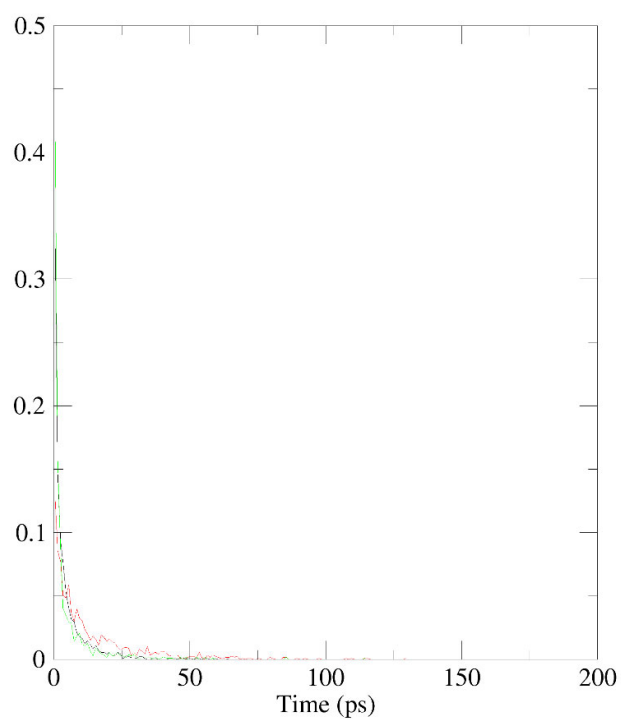

**Figure S5.** HBs lifetime for OA (black), HIMOXOL (red) or Br-HIMOLID (light green) and Asn850 obtained from the MD simulation.



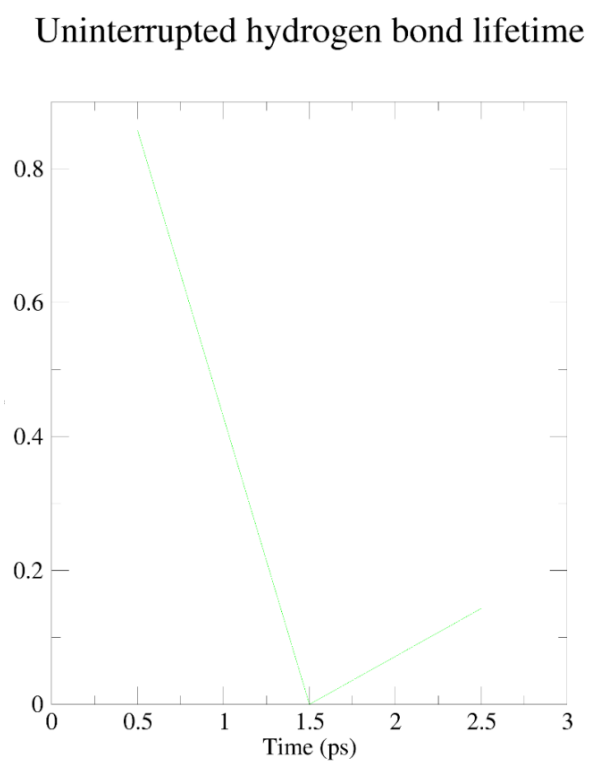

**Figure S7.** HBs lifetime for OA (black), HIMOXOL (red) or Br-HIMOLID (light green) and Arg811 obtained from the MD simulation.

## Uninterrupted hydrogen bond lifetime

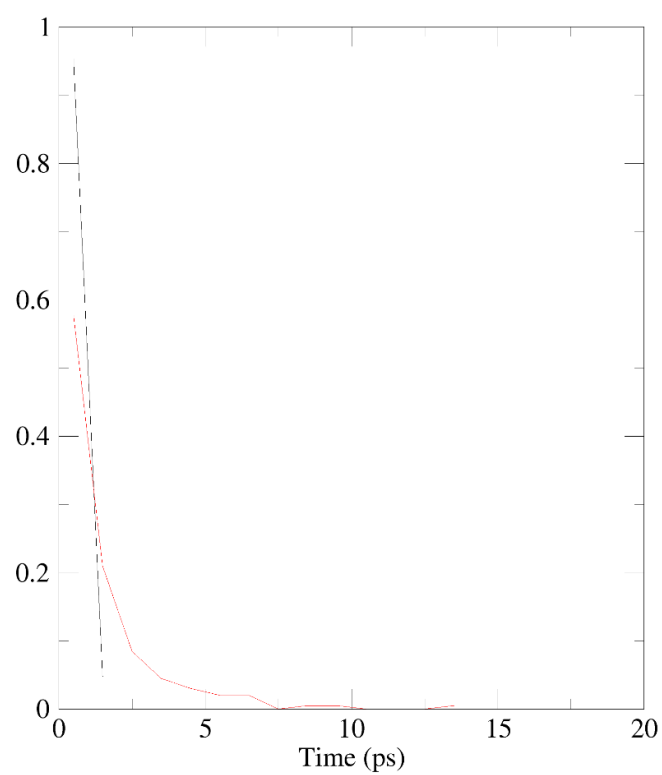

**Figure S8.** HBs lifetime for OA (black), HIMOXOL (red) or Br-HIMOLID (light green) and Arg849 obtained from the MD simulation.

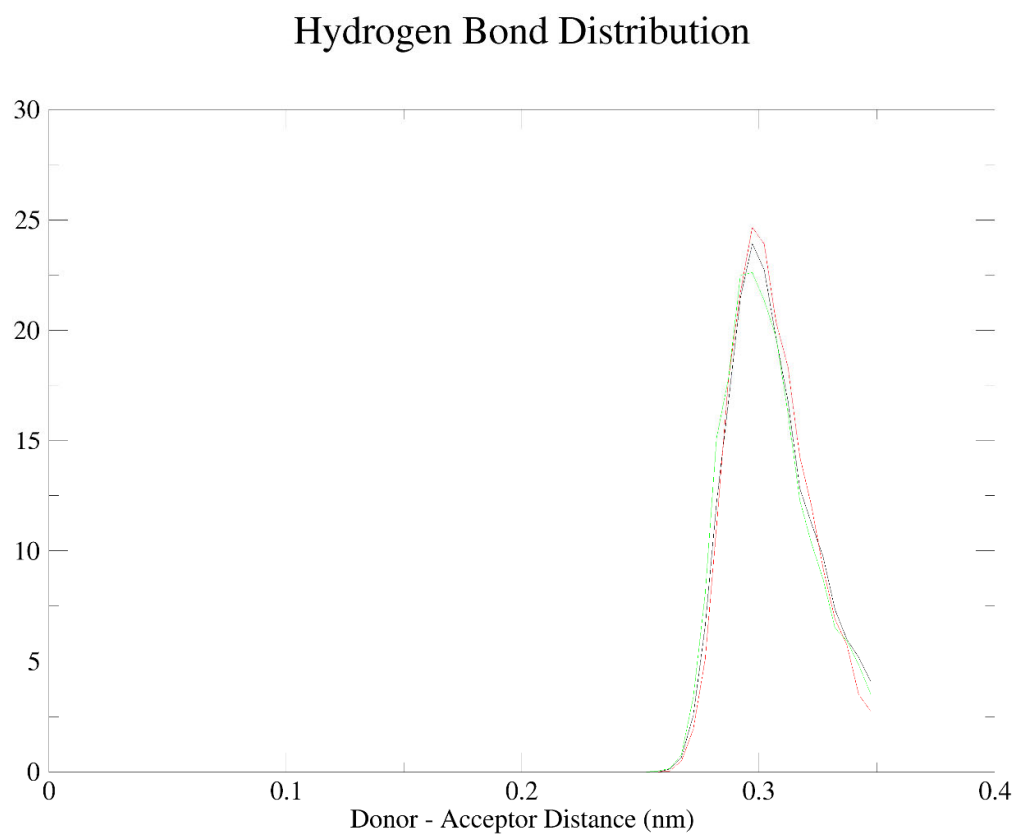

**Figure S9.** Donor-acceptor distances within HBs for OA (black), HIMOXOL (red) or Br-HIMOLID (light green) and Phe731 obtained from the MD simulation.

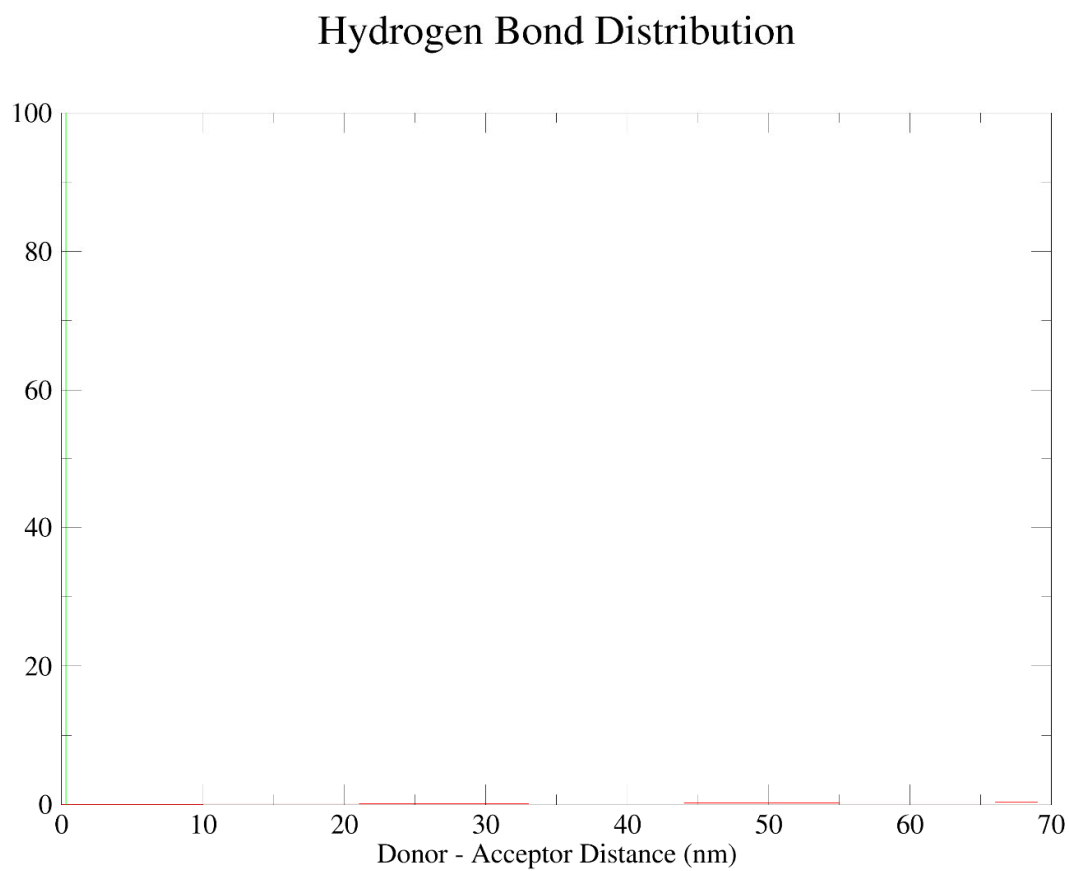

**Figure S10.** Donor–acceptor distances within HBs for OA (black), HIMOXOL (red) or Br-HIMOLID (light green) and Arg811 obtained from the MD simulation.

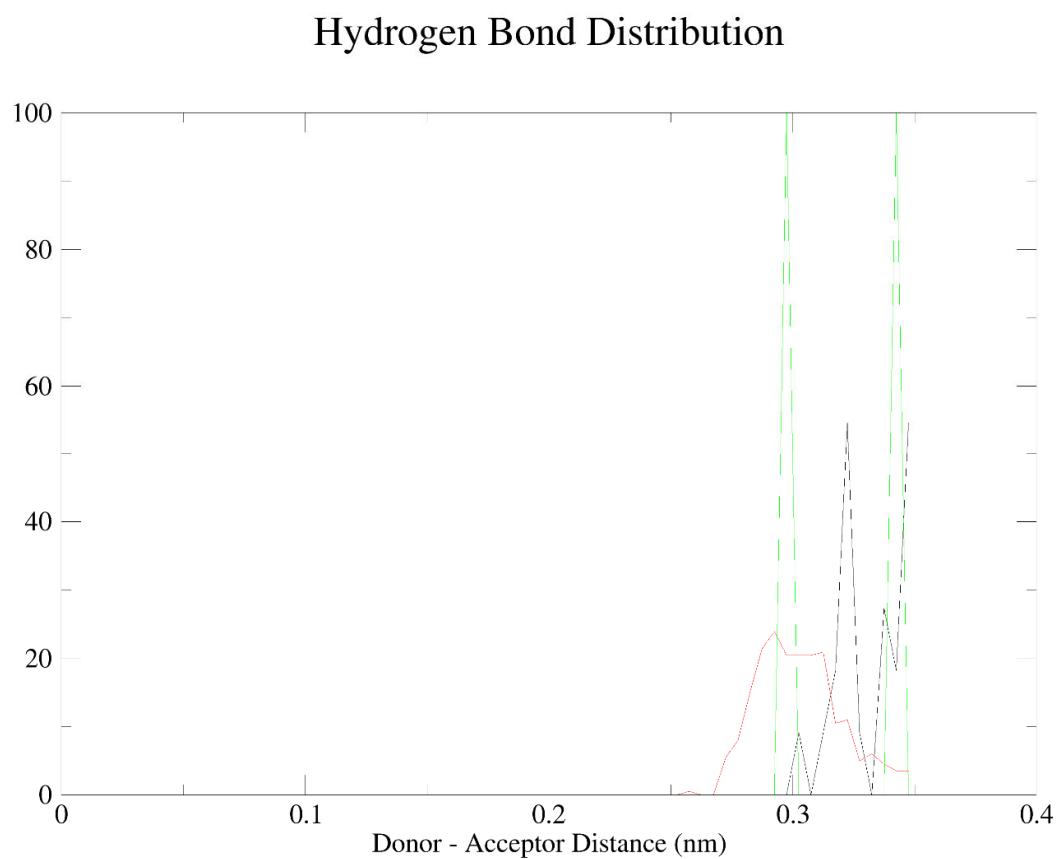

**Figure S11.** Donor-acceptor distances within HBs for OA (black), HIMOXOL (red) or Br-HIMOLID (light green) and Arg849 obtained from the MD simulation.
